# Supplementary material for: Ontogeny of different subsets of yellow fever virus-specific circulatory CXCR5+ CD4+ T cells after yellow fever vaccination
Source: PubMed Central journal article supplement (PMC7519049; doi:10.1038/s41598-020-72610-6), 2020-09-24
Supplement: 41598_2020_72610_MOESM1_ESM.pdf [file 41598_2020_72610_MOESM1_ESM.pdf]

## Supplemental Material

### Ontogeny of different subsets of yellow fever virus-specific circulatory CXCR5<sup>+</sup> CD4<sup>+</sup> T cells after yellow fever vaccination

Quinn DeGottardi<sup>1,2</sup>, Theresa J Gates<sup>1</sup>, Junbao Yang<sup>1,3</sup>, Eddie A James<sup>1</sup>, Uma Malhotra<sup>1,4</sup>, I-Ting Chow<sup>1</sup>, Yannick Simoni<sup>5</sup>, Michael Fehlings<sup>6</sup>, Evan W Newell<sup>5</sup>, Hannah A. DeBerg<sup>1</sup>, William W Kwok<sup>1,7,\*</sup>

1 Benaroya Research Institute at Virginia Mason Medical Center, Seattle, WA

2 Current address, Adaptive Biotechnologies, Seattle, WA

3 Current address, Cs-Bay Therapeutics, Newark, CA

4 Virginia Mason Hospital, Seattle, WA

5 Vaccine and Infectious Disease Division, Fred Hutchinson Cancer Research Center, Seattle, WA

6 Singapore Immunology Network, Agency for Science Research and Technology, Singapore

7 Department of Medicine, University of Washington, Seattle, WA

\* Corresponding Author: William W Kwok, Benaroya Research Institute at Virginia Mason, 1201, 9<sup>th</sup> Ave, Seattle, WA 98101, [bkwok@benaroyaresearch.org](mailto:bkwok@benaroyaresearch.org)

## Figure Legends

**Figure S1. Gating Strategy in identifying and defining the surface phenotype of antigen specific CD4<sup>+</sup> T cells.** For identifying epitope specific cells, singlet live cells that were CD45<sup>+</sup>CD14<sup>-</sup>CD19<sup>-</sup>CD3<sup>+</sup>CD4<sup>+</sup> were manually gated. Boolean gating was then applied to identify cells that were labeled with the two specific metals which were associated with the epitope of interest, and negative for the other 5 irrelevant tetramer metals. This double positive population was then gated to analyze the surface markers of interest. The figure also depicted the overlaid of these epitope specific cells onto other CD4<sup>+</sup> T cells that were outside the Boolean gate.

**Figure S2. Expression of CD38 on surface of Flu B HA-specific cells from subject YFV027.** PBMCs from subject YFV027 at day 0, 14 and 60 were stained with a panel of 6 different DRB1\*0301 tetramers and 28 different antibodies as listed in Table S1 and S2. DRB1\*0301 restricted FLU B HA-specific cells were identified by Boolean gating strategy and overlaid onto total CD4<sup>+</sup> T cells. Surface expression of CD38 on these cells are as shown.

**Figure S3. Differences in cell surface phenotype of YFV NS1-specific and FLU B HA-specific CD4<sup>+</sup> T cells at day 14 post YF-Vax vaccination.** PBMCs from a DRB1\*0301 subject were stained with a panel of 6 different DRB1\*0301 tetramers and 28 different antibodies as listed in Table S1 and S2. YFV NS1-specific and FLU B HA-specific cells were identified by Boolean gating strategy. Surface markers that are distinct between YFV NS1-specific and FLU B HA-specific CD4<sup>+</sup> are marked by arrows.

**Figure S4. Expression patterns of surface markers of total CD4<sup>+</sup> T cells and antigen specific cells as visualized by UMAP.** UMAP was applied for visualization of the high dimensional CyTOF data set which examines the surface expression of 21 different markers in total CD4<sup>+</sup> T cells, YFV-specific, EBV-specific, FLU-specific and TT-specific CD4<sup>+</sup> T cells. UMAP projection of a total of 82,811 CD4<sup>+</sup> T cells from all 9 subjects at all time points assayed

(a total of 58 samples), including 17,851 YFV-specific, 1,280 EBV-specific, 2,913 FLU-specific, 2,767 TT-specific CD4<sup>+</sup> T cells and from 58,000 non-YFV, non-EBV, non-FLU, and non-TT CD4<sup>+</sup> T cells with 1,000 cells from each subject at each time point. The expression level of each indicated marker is as shown.

**Figure S5. Distribution of YFV-specific cells in UMAP pre and post YF-Vax vaccination highlighted by different visit. (A)** UMAP was applied for visualization of the high dimensional CyTOF data set which examines the surface expression of 21 different markers in total CD4<sup>+</sup> T cells, YFV-specific, EBV-specific, FLU-specific and TT-specific CD4<sup>+</sup> T cells for all 9 samples at all time points as shown in Fig. 4 and S3. The distributions of YFV-specific CD4<sup>+</sup> T cells at different time point pre and post YF-Vax vaccination are as shown. Both non-YFV-specific CD4<sup>+</sup> T cells and YFV-specific are included in the analysis. **(B)** UMAP was applied for visualization of the high dimensional CyTOF data set which examine the surface expression of 21 different markers in YFV ENV-specific, YFV NS1-specific, YFV NS3-specific CD4<sup>+</sup> T cells for all 9 samples at all time points as shown in Fig. 4. A total of 5,246 YFV ENV-specific, 8005 YFV NS1-specific and 4,600 YFV NS3-specific cells as identified by YFV-specific tetramer staining were included in the analysis. Non-YFV-specific CD4<sup>+</sup> T cells were excluded in the analysis. The distributions of YFV-specific CD4<sup>+</sup> T cells at different time point pre and post YF-Vax vaccination are as shown. **(C)** Expression of CXCR5 in YFV-specific cells as projected by UMAP.

**Figure S6. CXCR5 expression of YFV ENV-specific CD4<sup>+</sup> T cells at different time point post vaccination.** PBMCs from a DRB1\*0301 subject were stained with a panel of tetramers and antibodies at day 14, 28 and 60 post vaccination. YFV-ENV specific T cells were identified by using Boolean gates. The percentages of YFV ENV-specific cells that expressed CXCR5 are shown. Frequencies of these YFV ENV-specific CXCR5<sup>+</sup> cells were determined to be at 39, 66 and 111 per million CD4<sup>+</sup> cells at day 14, 28 and 60 respectively.

**Figure S7. Relative expression of PD1 of different subsets of cCXCR5 YFV-specific cells overtime.** Expression of PD1 on the 4 groups of cCXCR5 T cells by visit. The y-axis shows the result of averaging the normalized marker intensity values over all subjects.

**Figure S8. Frequencies of different subsets YFV- specific cCXCR5<sup>+</sup>CD4<sup>+</sup> T cells at different time points post vaccination. (A)** Average frequencies of CD38<sup>+</sup>ICOS<sup>+</sup>PD1<sup>+</sup>, CD38<sup>+</sup>ICOS<sup>-</sup>PD1<sup>+</sup>, CD38<sup>-</sup>ICOS<sup>-</sup>PD1<sup>+</sup> and CD38<sup>-</sup>ICOS<sup>-</sup>PD1<sup>-</sup> YFV ENV-specific cells at different time points post vaccination. **(B)** Average frequencies of CD38<sup>+</sup>ICOS<sup>-</sup>PD1<sup>-</sup>, CD38<sup>-</sup>ICOS<sup>+</sup>PD1<sup>-</sup>, CD38<sup>-</sup>ICOS<sup>+</sup>PD1<sup>+</sup> and CD38<sup>+</sup>ICOS<sup>+</sup>PD1<sup>-</sup> YFV ENV-specific cells at different time points post vaccination. **(C)** Percentages of YFV NS1- and ENV- specific cCXCR5<sup>+</sup> cells that expressed the indicated markers at different time points are as shown. **(D)** Average frequencies of ICOS<sup>+</sup>PD1<sup>+</sup>CXCR5<sup>-</sup> YFV-ENV specific CD4<sup>+</sup> T cells at different time points post vaccination. Shown are the means with SD (n=9 for the first 6 time point, and n = 4 for the last time point).

Figure S1

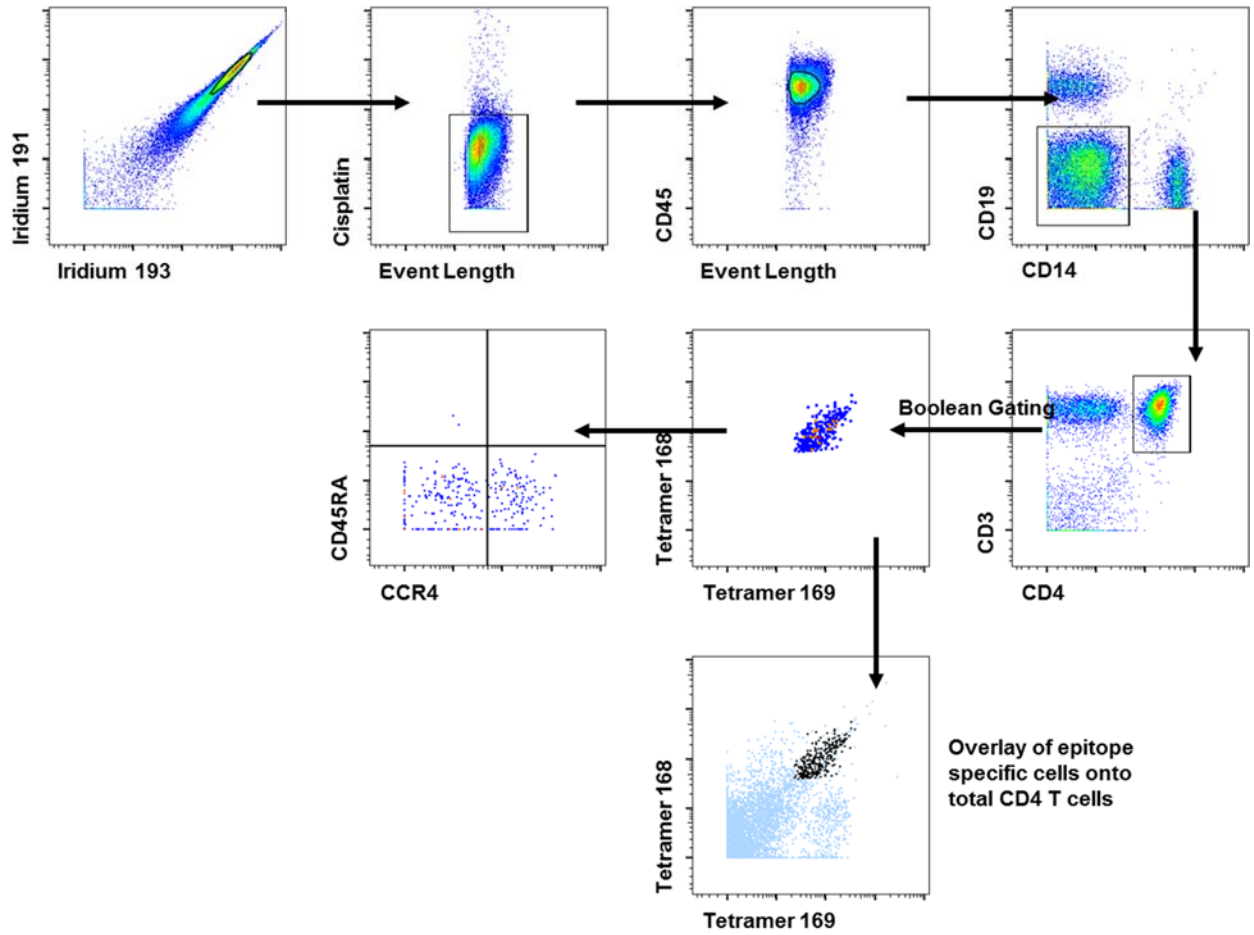

Figure S2

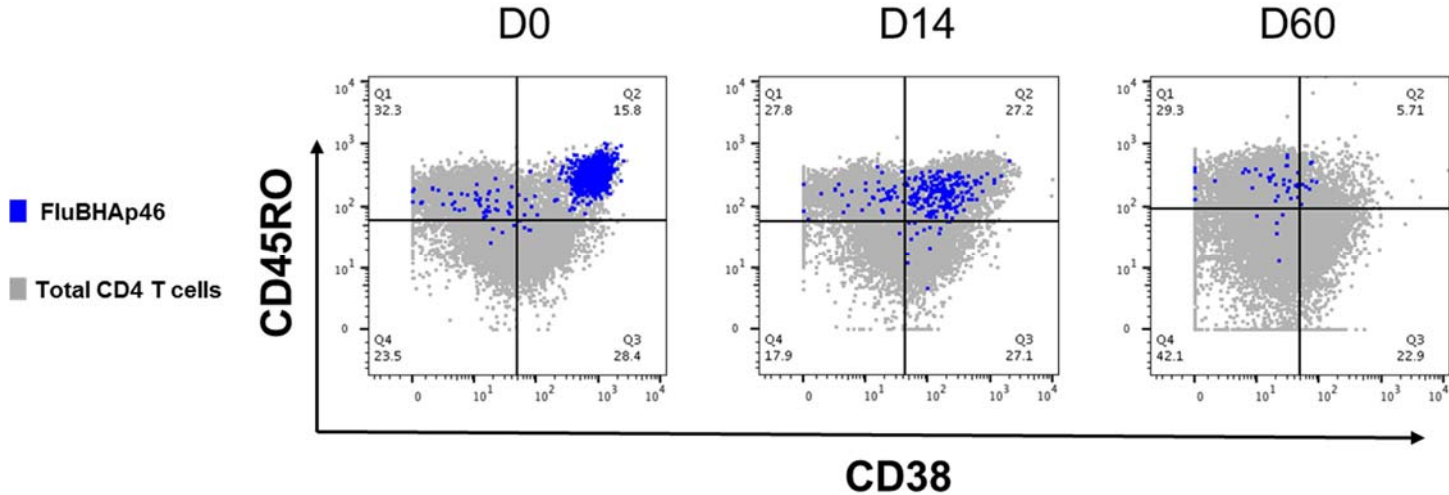

Figure S3

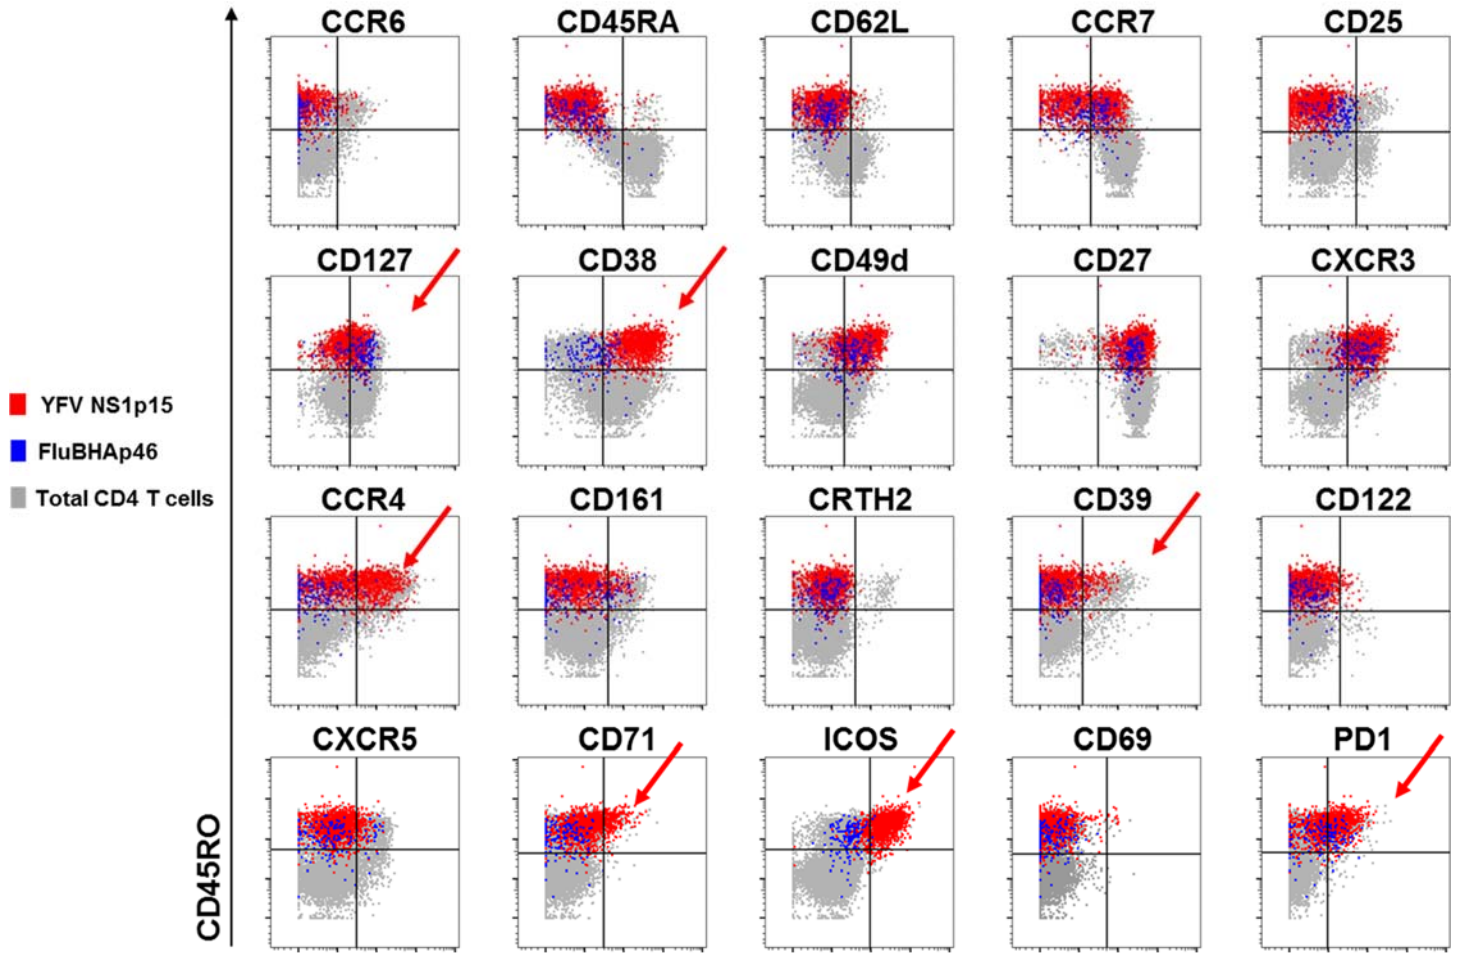

Figure S4

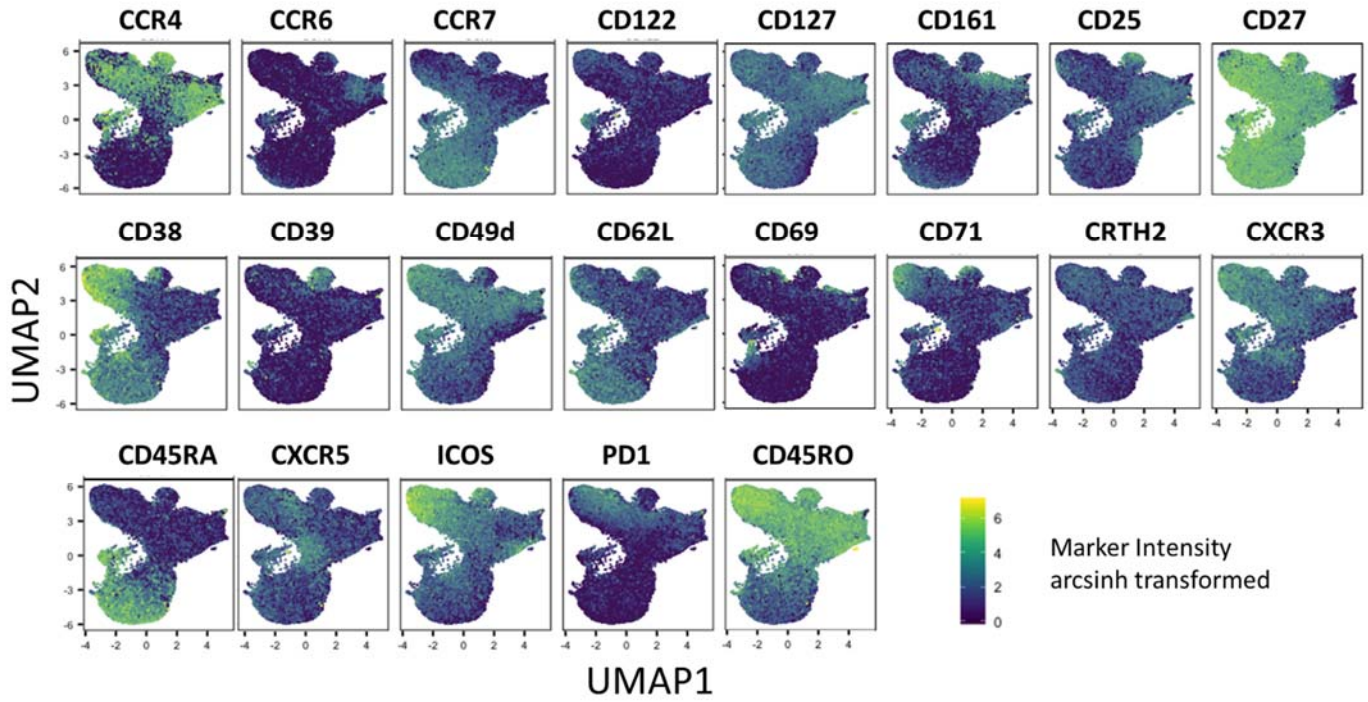



Figure S5

**a**

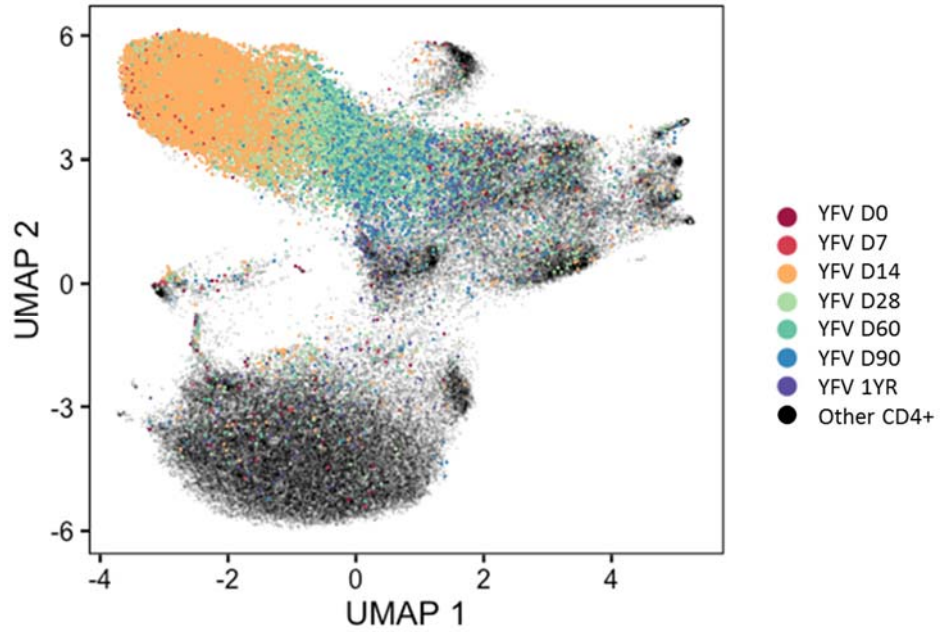

**b**

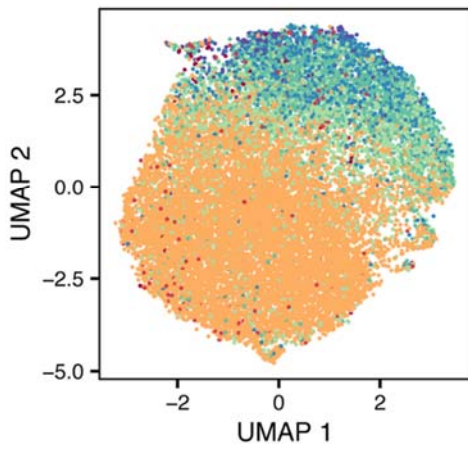

**c**

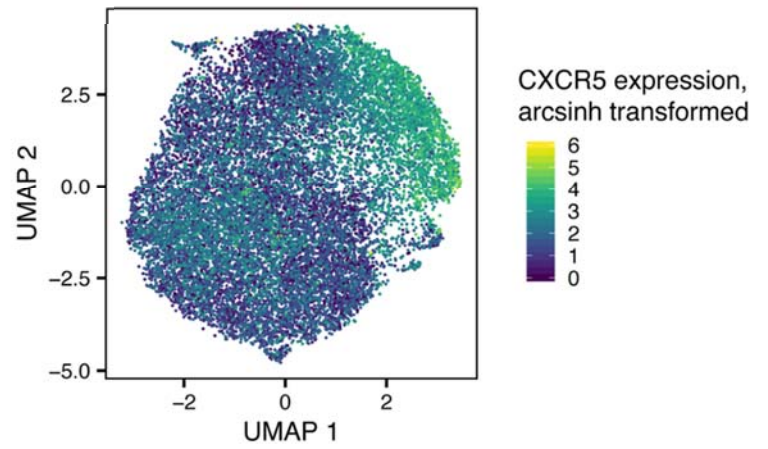

Figure S6

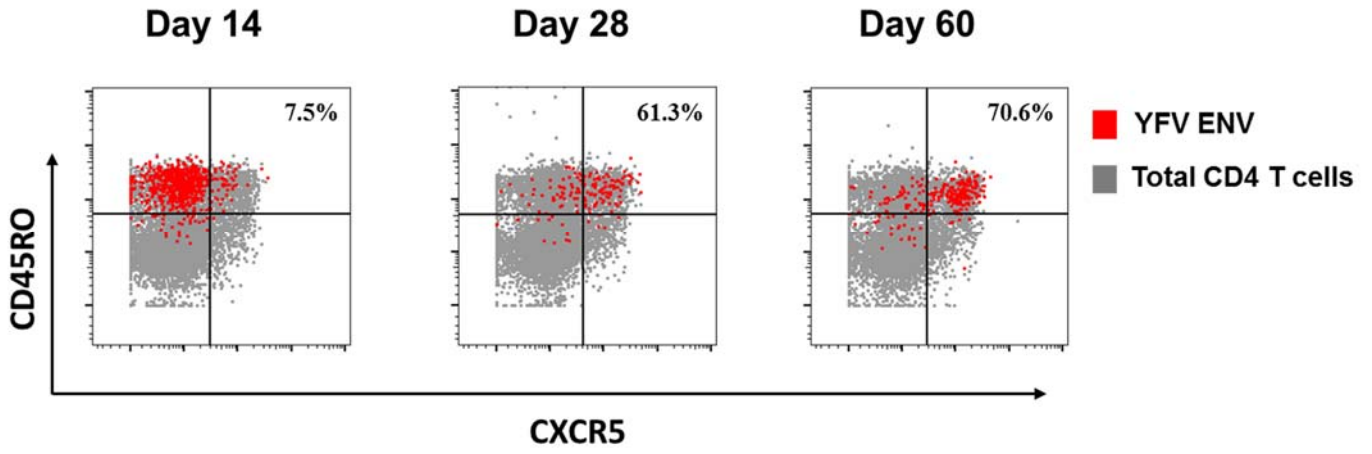

Figure S7

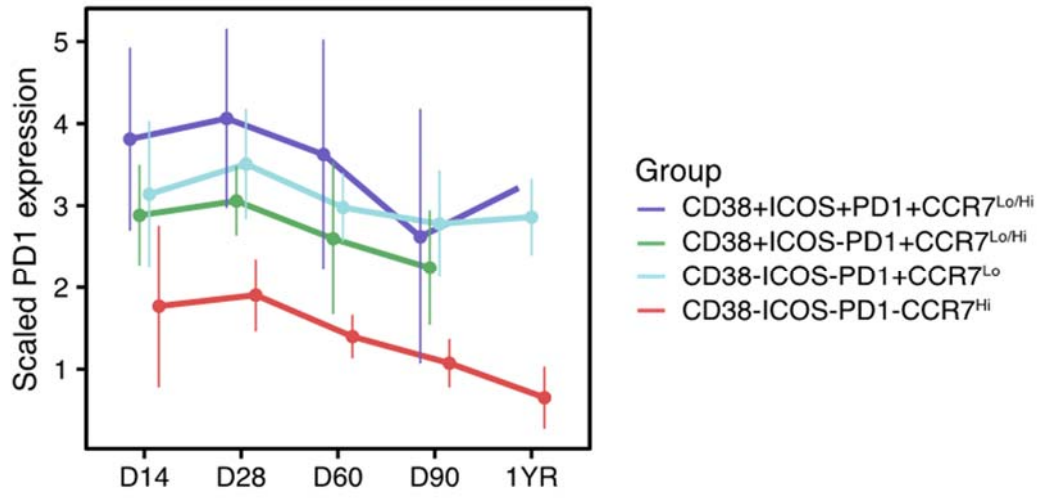

Figure S8

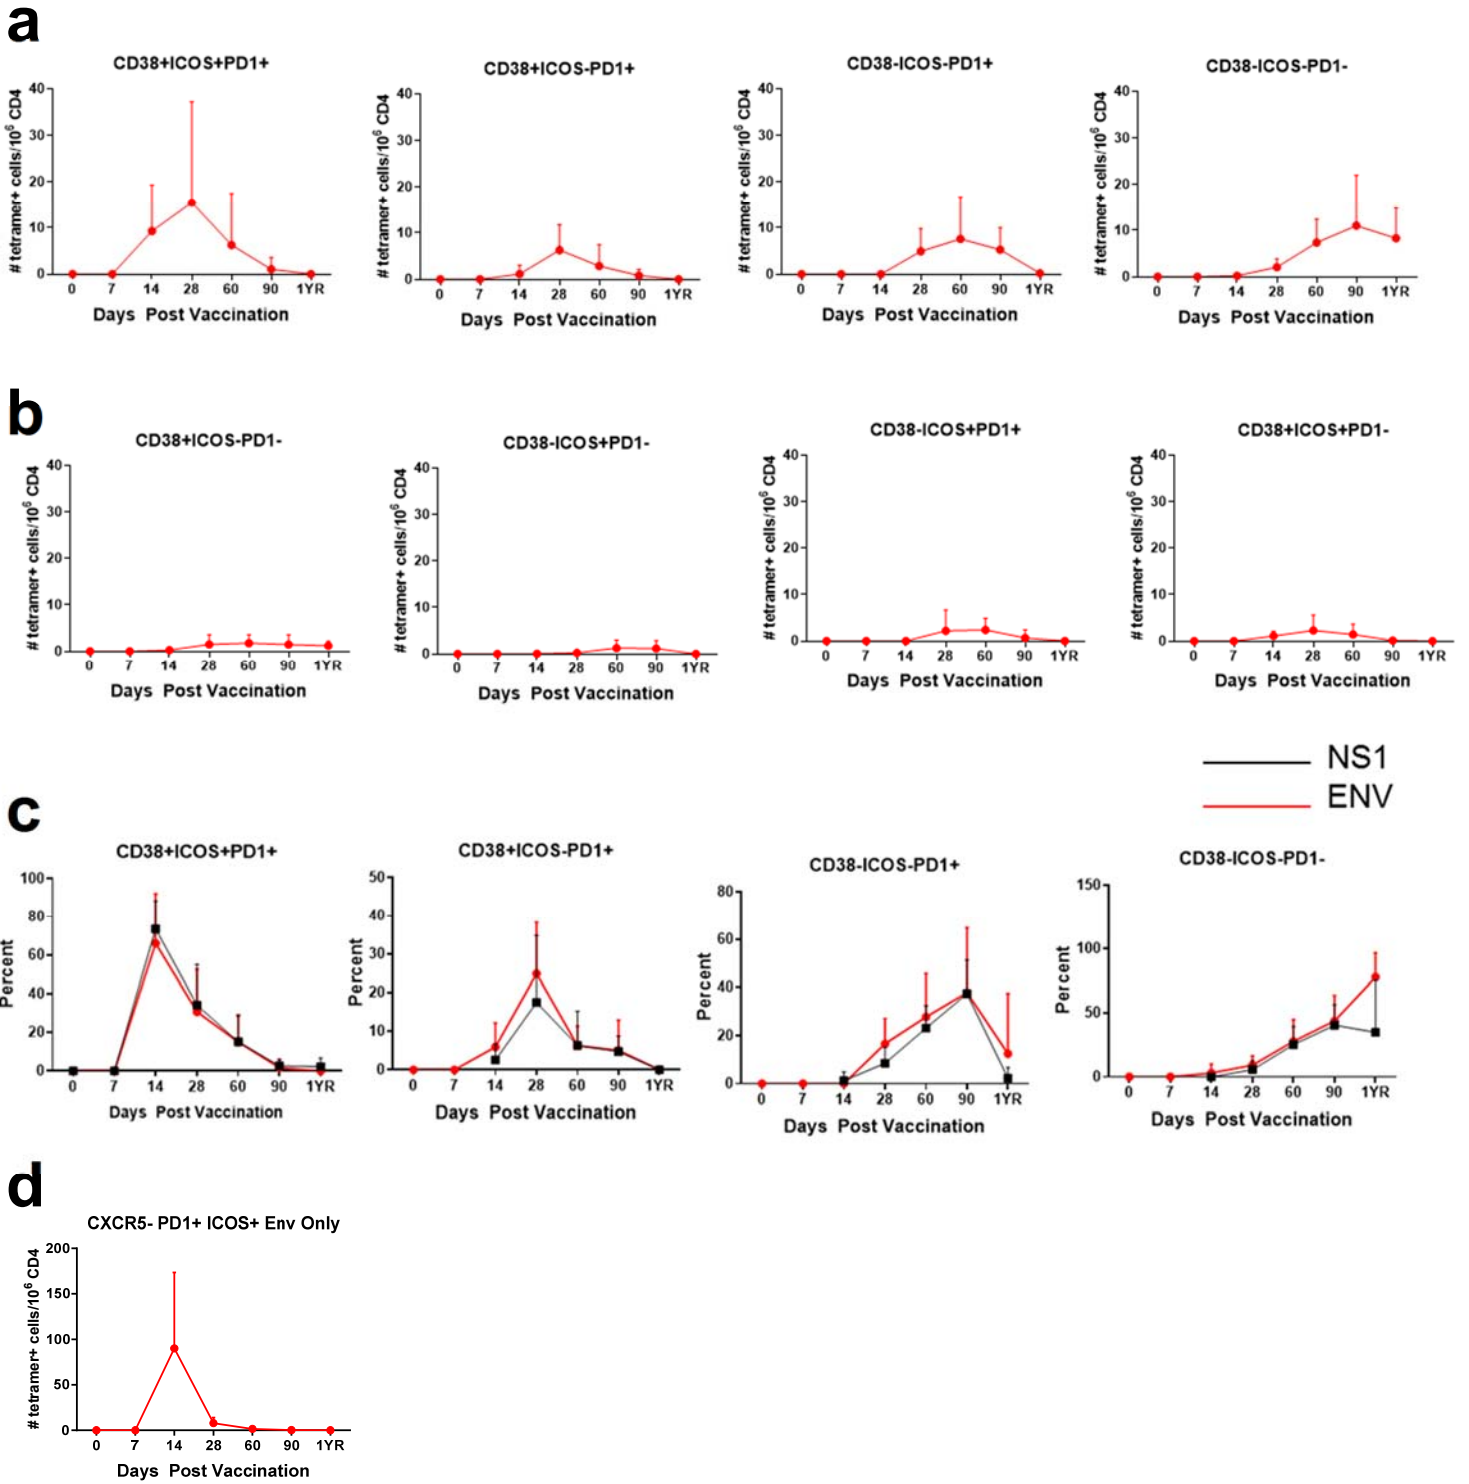

**Table S1: T cell epitopes and tetramer reagents**

| <b>HLA</b> | <b>Epitope</b>    | <b>Amino Acid sequences</b> | <b>Tag</b> |
|------------|-------------------|-----------------------------|------------|
| DRB1*0301  | YFV ENV 43-59     | ISLETVAIDRPAEVRKV           | 163, 164   |
| DRB1*0301  | YFV NS1 85-101    | DISVVVQDPKNVYQRGT           | 168, 169   |
| DRB1*0301  | YFV NS3 355-371   | WILADKRPTAWFLPSIR           | 171, 173   |
| DRB1*0301  | TT 506-525        | NYSLDKIIVDYNLQSKITLP        | 163, 173   |
| DRB1*0301  | EBV EBNA2 301-320 | PAQPPPGVINDQQLHHLPSG        | 168, 175   |
| DRB1*0301  | FLU B HA 258-274  | GRIVVDYMVQKPGKTGT           | 169, 171   |
| DRB1*1101  | YFV ENV 373-389   | DSYIIVGRGDSRLTYQW           | PE         |
| DRB1*1501  | YFV ENV 457-473   | MGAVLIWVGINTRNMTM           | PE         |
| DRB1*1101  | FLU A HA 161-189  | FYKNLIWLVKKGNSYPKLSK        | PE         |
| DRB1*1501  | FLU A HA 433-452  | LDIWTYNAELLVLENERL          | PE         |

**Table S2: Antibodies used in CyTOF experiments**

| <b>Antibody</b> | <b>Metal</b> | <b>Vendor</b> | <b>Clone</b> |
|-----------------|--------------|---------------|--------------|
| CD45            | 89           | Fluidigm      | HI30         |
| CCR6            | 141          | Biolegend     | G034E3       |
| CD19            | 142          | Fluidigm      | HIB19        |
| CD45RA          | 143          | Fluidigm      | HI100        |
| CD62L           | 144          | Biolegend     | DREG-56      |
| CD4             | 145          | Fluidigm      | RPA-T4       |
| CD8             | 146          | Fluidigm      | RPAT8        |
| CD20            | 147          | Fluidigm      | 2H7          |
| CCR7            | 148          | Biolegend     | G043H7       |
| CD25            | 149          | Fluidigm      | 2A3          |
| CD3             | 150          | Biolegend     | OKT3         |
| CD45RO          | 151          | Biolegend     | UCHL1        |
| CD127           | 152          | Biolegend     | A01955       |
| CD38            | 153          | Biolegend     | HIT2         |
| CD49d           | 154          | Biolegend     | 9F10         |
| CD27            | 155          | Fluidigm      | L128         |
| CXCR3           | 156          | Biolegend     | G025H7       |
| CCR4            | 158          | Fluidigm      | L291H4       |
| CD161           | 159          | Biolegend     | HP3G10       |
| CD14            | 160          | Fluidigm      | M5E2         |
| CRTH2           | 161          | Biolegend     | BM16         |
| CD39            | 162          | Biolegend     | A1           |
| CD122           | 165          | Biolegend     | Tu27         |
| CXCR5           | 166          | BD Pharmingen | RF8B2        |
| CD71            | 167          | Biolegend     | CYIG4        |
| ICOS            | 170          | Biolegend     | C398.4A      |
| OX40            | 172          | Biolegend     | Act-35       |
| PD1             | 174          | eBiosciences  | eBioJ105     |

**Table S3: Percentage of cells in each of the nineteen different phenotypic cluster**

| Cluster | EBV   | FLU   | TT    | YFV   | Other CD4+ |             |
|---------|-------|-------|-------|-------|------------|-------------|
| 1       | 0.55  | 1.75  | 4.16  | 0.67  | 9.49       | Naive       |
| 2       | 1.33  | 0.58  | 0.58  | 0.45  | 3.46       | Treg like   |
| 3       | 0.16  | 1.34  | 0.69  | 0.07  | 3.96       |             |
| 4       | 0.08  | 0.03  | 0.07  | 0     | 0.06       |             |
| 5       | 0.86  | 0.34  | 0.22  | 0.21  | 0.87       |             |
| 6       | 6.8   | 4.63  | 1.23  | 22.22 | 2.28       | Activated   |
| 7       | 4.61  | 4.67  | 0.51  | 50.37 | 1.02       | Activated   |
| 8       | 32.34 | 57.09 | 29.74 | 4.12  | 5.31       | Th1 like    |
| 9       | 2.81  | 0.48  | 0.51  | 1.15  | 0.16       |             |
| 10      | 28.98 | 8.72  | 3.29  | 15.72 | 2.13       | cCXCR5 like |
| 11      | 1.95  | 0.45  | 16.15 | 0.31  | 3.19       | Th17 like   |
| 12      | 6.25  | 6.18  | 33.86 | 1.13  | 6.94       | Th17 like   |
| 13      | 3.83  | 0.58  | 0.72  | 0.28  | 5.73       | Naive       |
| 14      | 0.94  | 0.03  | 0.14  | 0.22  | 0.39       |             |
| 15      | 1.09  | 0.76  | 1.26  | 0.34  | 0.98       |             |
| 16      | 0     | 0.07  | 0     | 0.03  | 0.03       |             |
| 17      | 5.55  | 7.62  | 2.2   | 1.17  | 7.07       | cCXCR5 like |
| 18      | 1.62  | 2.06  | 2.71  | 0.98  | 7.63       | Th2 like    |
| 19      | 0.23  | 2.61  | 1.95  | 0.57  | 39.31      | Naive       |

**Table S4. Percentage of YFV-specific cells across the nineteen phenotypic clusters at different time point**

| Cluster | Day 0 | Day 7 | Day 14 | Day 28 | Day 60 | Day 90 | 1 year |             |
|---------|-------|-------|--------|--------|--------|--------|--------|-------------|
| 1       | 20.25 | 5.19  | 0.15   | 0.88   | 0.79   | 1.45   | 6.33   | Naive       |
| 2       | 3.8   | 5.19  | 0.22   | 0.56   | 0.74   | 1.02   | 0.32   | Treg like   |
| 3       | 1.27  | 0     | 0.04   | 0      | 0.19   | 0      | 0.95   |             |
| 4       | 0     | 0     | 0      | 0      | 0      | 0      | 0      |             |
| 5       | 0     | 0     | 0.06   | 0.46   | 0.32   | 0.68   | 0.95   |             |
| 6       | 5.06  | 6.49  | 18.76  | 36.88  | 25.54  | 20.85  | 6.33   | Activated   |
| 7       | 6.33  | 51.95 | 74.83  | 16.7   | 3.75   | 2.55   | 0.32   | Activated   |
| 8       | 12.66 | 3.9   | 0.26   | 5.72   | 10.46  | 13.19  | 46.52  | Th1 like    |
| 9       | 2.53  | 1.3   | 0.89   | 1.75   | 1.8    | 1.02   | 0.32   |             |
| 10      | 6.33  | 3.9   | 3.57   | 30.81  | 46.97  | 40.77  | 8.23   | cCXCR5 like |
| 11      | 2.53  | 1.3   | 0.12   | 0.46   | 0.32   | 1.36   | 0.63   | Th17 like   |
| 12      | 2.53  | 4.55  | 0.34   | 1.58   | 2.5    | 3.66   | 3.8    | Th17 like   |
| 13      | 10.13 | 0.65  | 0.04   | 0.39   | 0.88   | 0.09   | 1.58   | Naive       |
| 14      | 3.8   | 4.55  | 0.04   | 0.14   | 0.51   | 0.85   | 0.32   |             |
| 15      | 5.06  | 4.55  | 0.21   | 0.53   | 0.23   | 0.51   | 0      |             |
| 16      | 2.53  | 0.65  | 0      | 0      | 0.05   | 0.09   | 0      |             |
| 17      | 3.8   | 1.95  | 0.07   | 0.53   | 2.13   | 6.89   | 16.46  | cCXCR5 like |
| 18      | 2.53  | 1.3   | 0.25   | 1.72   | 2.13   | 3.49   | 2.22   | Th2 like    |
| 19      | 8.86  | 2.6   | 0.14   | 0.91   | 0.69   | 1.53   | 4.75   | Naive       |
